# Supplementary material
Source: publisher site journal article supplement (https://www.dovepress.com/article/539090)
Supplement: Supplementary file 1 [file PhakicPresbyopia.Supplementary.docx]

**Supplementary Figures**

**
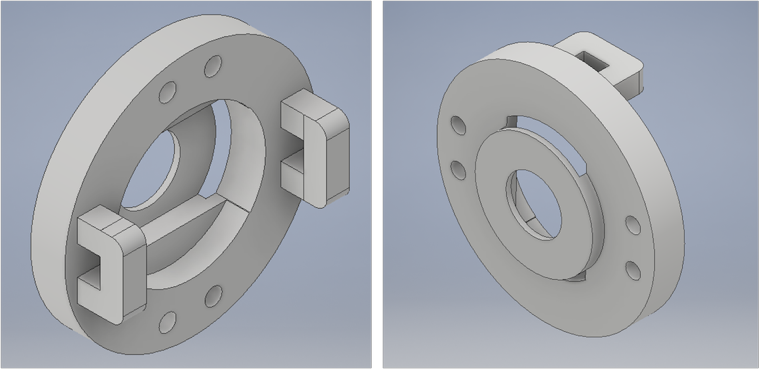
**

**Supplemental Figure 1.** The custom-made insert used to fit two phakic intraocular lenses into an eye model – a natural lens simulator and a phakic intraocular lens.


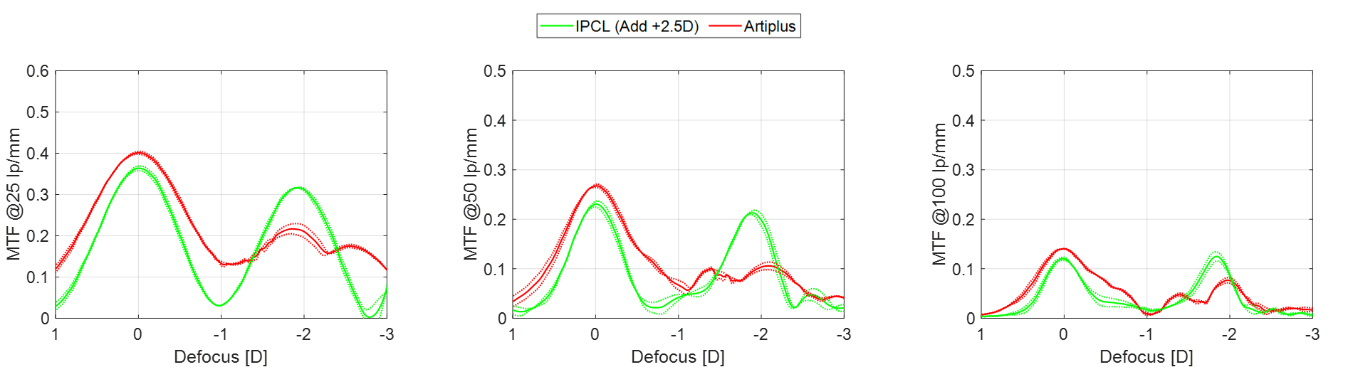


**Supplemental Figure 2.** The through-focus modulation transfer function curves of the tested phakic intraocular lenses for a 3mm pupil at a defocus of +1 to -3D corresponding to the spectacle plane. The dotted lines show the values of each lens separately; the solid lines refer to the average of two lenses. MTF = modulation transfer

function.


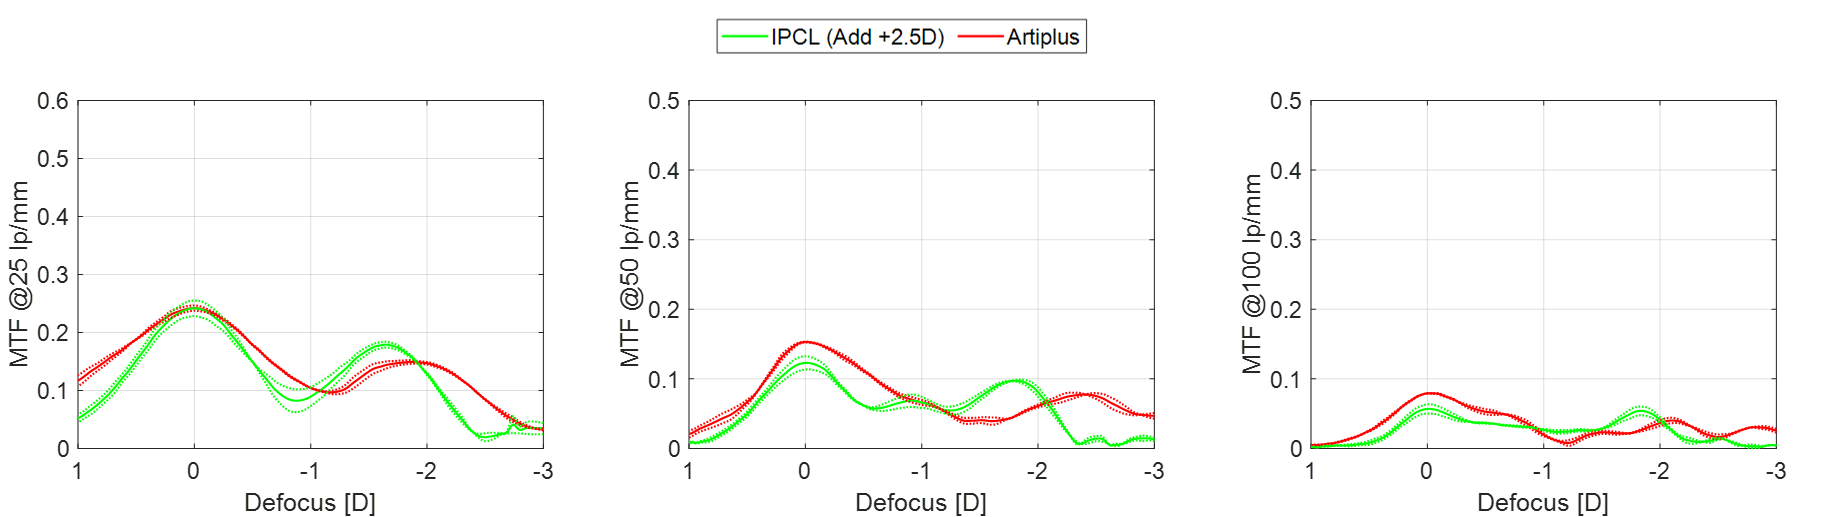


**Supplemental Figure 3.** The through-focus modulation transfer function curves of the tested phakic intraocular lenses for a 4.5mm pupil at a defocus of +1 to -3D corresponding to the spectacle plane. The dotted lines show the values of each lens separately; the solid lines refer to the average of two lenses. MTF = modulation transfer function.
